Title of withdrawn manuscript: Body dysmorphic-induced Androgenic Anabolic Steroids usage and its association with mental health outcomes

All author names and affiliations on the withdrawn manuscript:

Ahmed GAWASH<sup>1,2</sup>, Hasan ZIA<sup>2,3</sup>, David F. LO, MBS<sup>1,2,3,4</sup>

1. Department of Medicine, Rowan University School of Osteopathic Medicine, Stratford, NJ

2. American Preventive Screening & Education Association (APSEA), Stratford, NJ

3. Department of Biology, Rutgers, the State University of New Jersey, New Brunswick, NJ

4. Department of Medicine, Rutgers Robert Wood Johnson Medical School, New Brunswick, NJ

Withdrawal statement: The authors have withdrawn this manuscript because of significant methodological errors: Upon further review, we identified significant errors in our methodology that could impact the validity of our findings. Specifically, we realized that some of the analyses were conducted incorrectly, which may have led to misleading conclusions. We believe these errors could compromise the integrity of the results and misinform readers about the implications of our work. We are committed to ensuring the highest standards in our research, and correcting these issues will require substantial revisions and additional analyses. Therefore, the authors do not wish this work to be cited as reference for the project. If you have any questions, please contact the corresponding author.
